# Supplementary material
Source: HighWire-hosted journal article supplement (https://bibliotheek.ehb.be/content/4/1/e000280)

Suppl. Figure 1. Calibration plot by quintiles of predicted 5-year diabetes risk of the simplified GDRS for prediction of incident diagnosed type 2 diabetes in the 'GNHIES98 – longitudinal sample' (N=3,625).

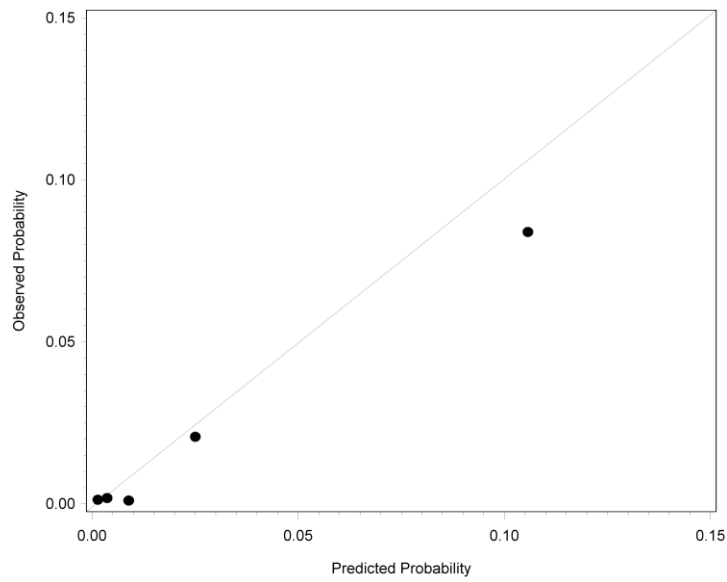

Supplement: inline-supplementary-material-1 [file inline-supplementary-material-1.pdf]
